# Supplementary material for: Use of electromagnetic navigation bronchoscopy in virtual-assisted lung mapping: the effect of on-site adjustment
Source: Springer Nature journal article supplement (doi:10.1007/s11748-019-01137-z), 2019-05-16
Supplement: MOESM3 [file 16728952]

**Use of electromagnetic navigation bronchoscopy in virtual-assisted lung mapping: the effect of on-site adjustment**

Masaaki Sato, MD, PhD; Yoshikazu Shinohara, MD; Masahiro Yanagiya, MD; Takahiro Karasaki, MD, PhD; Kentaro Kitano, MD, PhD; Kazuhiro Nagayama, MD, PhD; Jun Nakajima, MD, PhD

Department of Thoracic Surgery, The University of Tokyo Hospital, Tokyo, Japan

Corresponding author: Masaaki Sato, MD, PhD

Department of Thoracic Surgery, The University of Tokyo Hospital

7-3-1 Hongo, Bunkyo-ku, Tokyo 113-8655, Japan

Tel: +81-3-5800-9155; Fax: +81-3-5800-9156; E-mail: [satom-sur@h.u-tokyo.ac.jp](mailto:satom-sur@h.u-tokyo.ac.jp)

**Supplementary Figure 1. Preparation for ENB VAL-MAP using workstations. (a)** The lung map is designed using the mapping mode of Synapse Vincent®. The locational information of each planned marking is transferred to **(b)** the ENB system (superDimension™) and **(c)** a readily accessible radiology workstation (ZioCube®). In ENB, the root to reach the planned location of each marking is selected (the pink and blue line superimposed on the computed tomography images in (b)) for later real-time navigation of the bronchoscope. In the radiology workstation, the three-dimensional images are reconstructed from the DICOM data and the three-dimensional information of the marking locations. This three-dimensional image is finalized after ENB lung mapping. DICOM, digital imaging and communications in medicine; ENB, electromagnetic navigation bronchoscopy; VAL-MAP, virtual-assisted lung mapping.

**Supplementary video 1.** The video clip shows the procedure of ENB VAL-MAP followed by on-site adjustment and surgery.
